# Supplementary material for: Manuka honey's anti-metastatic impact on colon cancer stem-like cells: unveiling its effects on epithelial–mesenchymal transition, angiogenesis and telomere length
Source: Royal Society of Chemistry journal article supplement (doi:10.1039/d4fo00943f), 2024-01-01
Supplement: d4fo00943f1.pdf [file d4fo00943f1.pdf]

**LI-COR**<sup>®</sup>

Image ID: 000045\_01  
Acquire Time: 28-ott-2020 12.43.25

Page 1

Acquisition Information

| # | Image ID  | Acquire Time         | Sensitivity | Image Name  | Comment | Image Modifications |
|---|-----------|----------------------|-------------|-------------|---------|---------------------|
| 1 | 000045_01 | 28-ott-2020 12.43.25 | High        | angiogenesi |         |                     |

Image Display Values

| Channel | Color                       | Minimum | Maximum | K |
|---------|-----------------------------|---------|---------|---|
| Chemi   | Gray Scale (Black on White) | 1,23    | 50,9    | 0 |

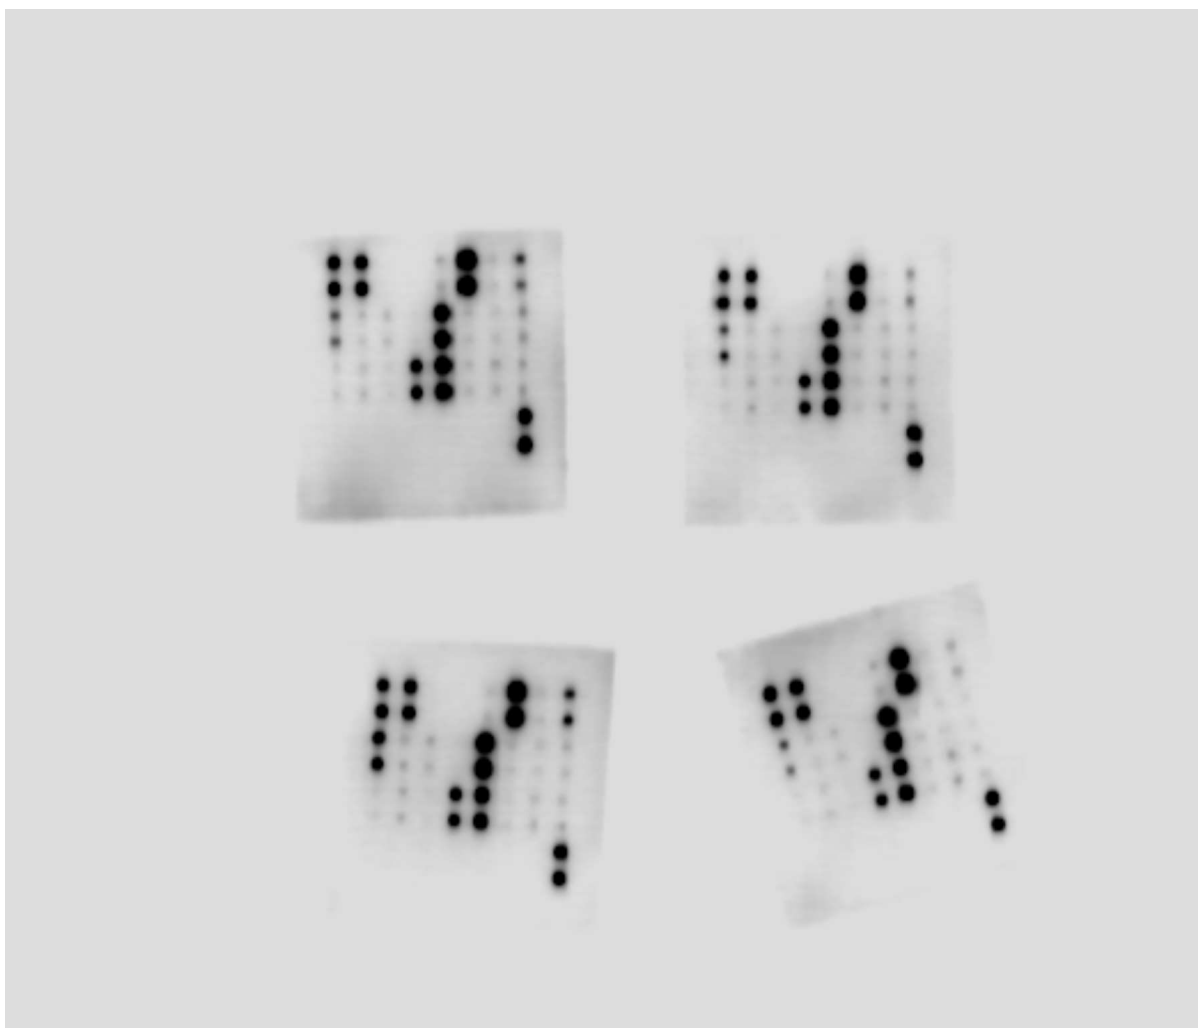

### Acquisition Information

| # | Image ID  | Acquire Time         | Sensitivity | Image Name  | Comment | Image Modifications |
|---|-----------|----------------------|-------------|-------------|---------|---------------------|
| 1 | 000045_01 | 28-ott-2020 12.43.25 | High        | angiogenesi |         |                     |

### Image Display Values

| Channel | Color                       | Minimum | Maximum | K |
|---------|-----------------------------|---------|---------|---|
| Chemi   | Gray Scale (Black on White) | 1,23    | 50,9    | 0 |

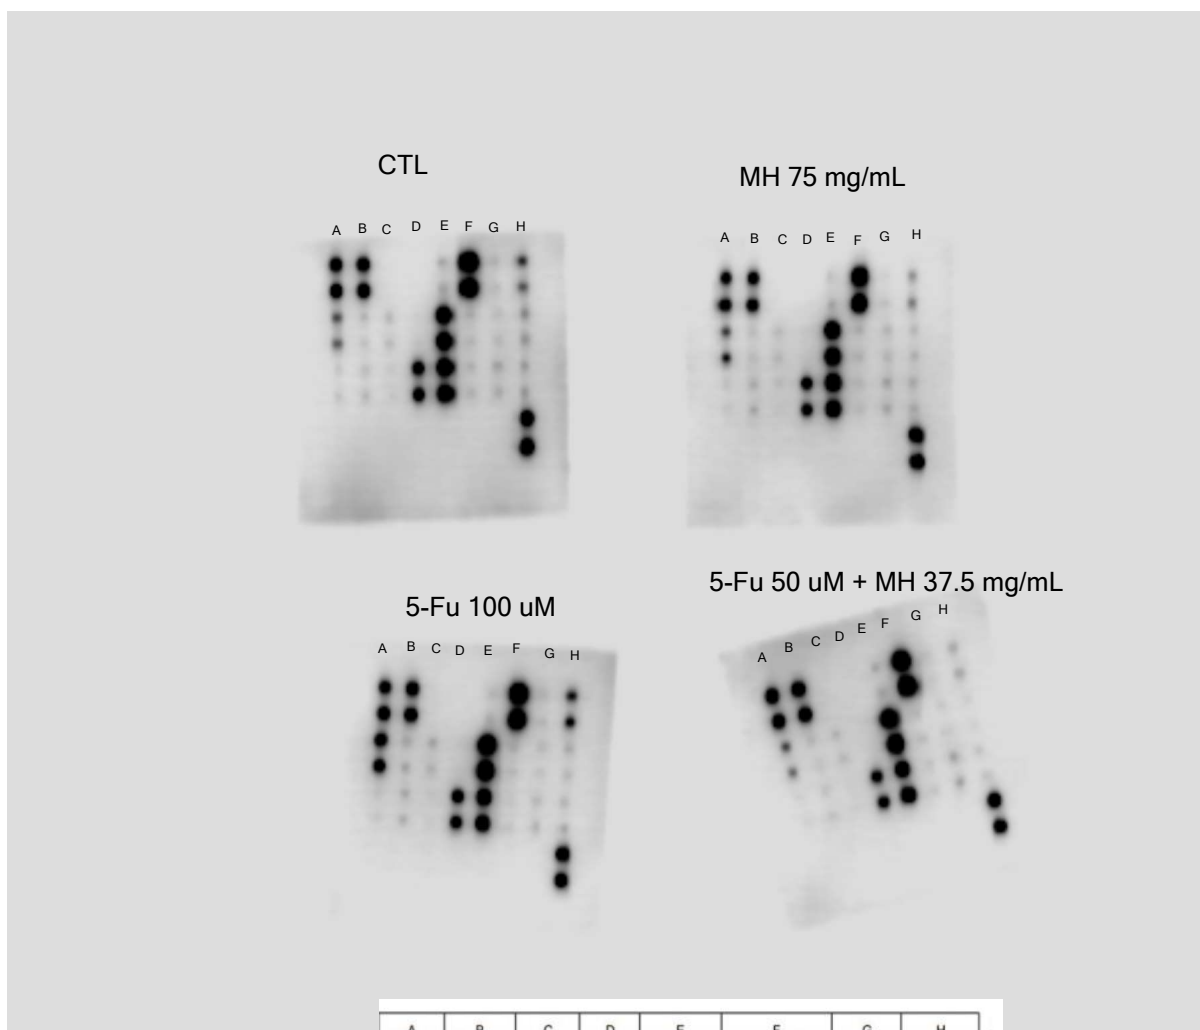

| A     | B             | C              | D      | E          | F              | G      | H       |
|-------|---------------|----------------|--------|------------|----------------|--------|---------|
| POS   | POS           | NEG            | NEG    | Angiogenin | EGF            | ENA-78 | bFGF    |
| POS   | POS           | NEG            | NEG    | Angiogenin | EGF            | ENA-78 | bFGF    |
| GRO   | IFN- $\gamma$ | IGF-1          | IL-6   | IL-8       | LEPTIN         | MCP-1  | PDGF-BB |
| GRO   | IFN- $\gamma$ | IGF-1          | IL-6   | IL-8       | LEPTIN         | MCP-1  | PDGF-BB |
| PIGF  | RANTES        | TGF- $\beta$ 1 | TIMP-1 | TIMP-2     | Thrombopoietin | VEGF   | VEGF-D  |
| PIGF  | RANTES        | TGF- $\beta$ 1 | TIMP-1 | TIMP-2     | Thrombopoietin | VEGF   | VEGF-D  |
| BLANK | BLANK         | BLANK          | BLANK  | BLANK      | BLANK          | NEG    | POS     |
| BLANK | BLANK         | BLANK          | BLANK  | BLANK      | BLANK          | NEG    | POS     |
